# Supplementary material for: Cervicovaginal microbiota and local immune response modulate the risk of spontaneous preterm delivery
Source: PubMed Central journal article supplement (PMC6428888; doi:10.1038/s41467-019-09285-9), 2019-03-21
Supplement: 41467_2019_9285_MOESM1_ESM.pdf [file 41467_2019_9285_MOESM1_ESM.pdf]

# Supplementary Materials

## **Cervicovaginal microbiota and local immune response modulate the risk of spontaneous preterm delivery**

Michal A. Elovitz<sup>1\*</sup>, Pawel Gajer<sup>2</sup>, Valerie Riis<sup>1</sup>, Amy G. Brown<sup>1</sup>, Michael S. Humphrys<sup>2</sup>, Johanna B. Holm<sup>2</sup>, Jacques Ravel<sup>2\*</sup>.

<sup>1</sup>Maternal and Child Health Research Center, Department of Obstetrics and Gynecology, Perelman School of Medicine, University of Pennsylvania, Philadelphia, PA 19104, USA

<sup>2</sup>Institute for Genome Sciences and Department of Microbiology and Immunology, Am, Baltimore, MD 21201, USA

Correspondence and should be addressed to M.A.E.(email: [melovitz@obgyn.upenn.edu](mailto:melovitz@obgyn.upenn.edu)) and J.R. (email: [jravel@som.umaryland.edu](mailto:jravel@som.umaryland.edu))

Contains:

Supplementary Figures 1-7  
Supplementary Tables 1-6

## Supplementary Figures

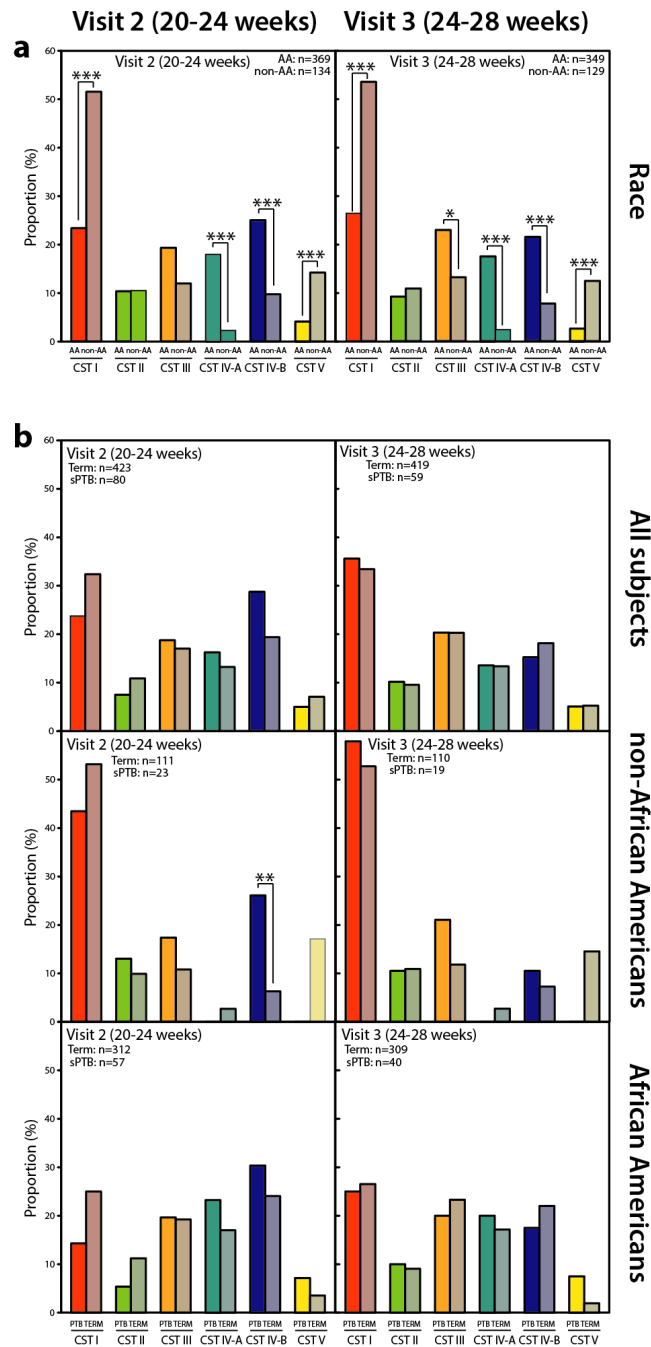

**Supplementary Figure 1** | Community state types association with race and birth outcomes. **(a)** Frequency of each CST in non-AA and AA pregnant women when considering samples collected at visit 2 (20-24 weeks of gestation) or visit 3 (24-28 weeks of gestation). **(b)** Frequency of each CST stratified by outcomes (sPTB vs Term) in all subjects, non-AA and AA when considering samples collected at visit 2 or visit 3. n represents the number of samples included in the analysis. p-values were estimated using mixed effects Poisson regression models (all visits) or ordinary logistic regression models (single visit) Statistical significance is shown as \* p-value < 0.01, \*\* p-value < 0.001 and \*\*\* p-value < 0.0001.

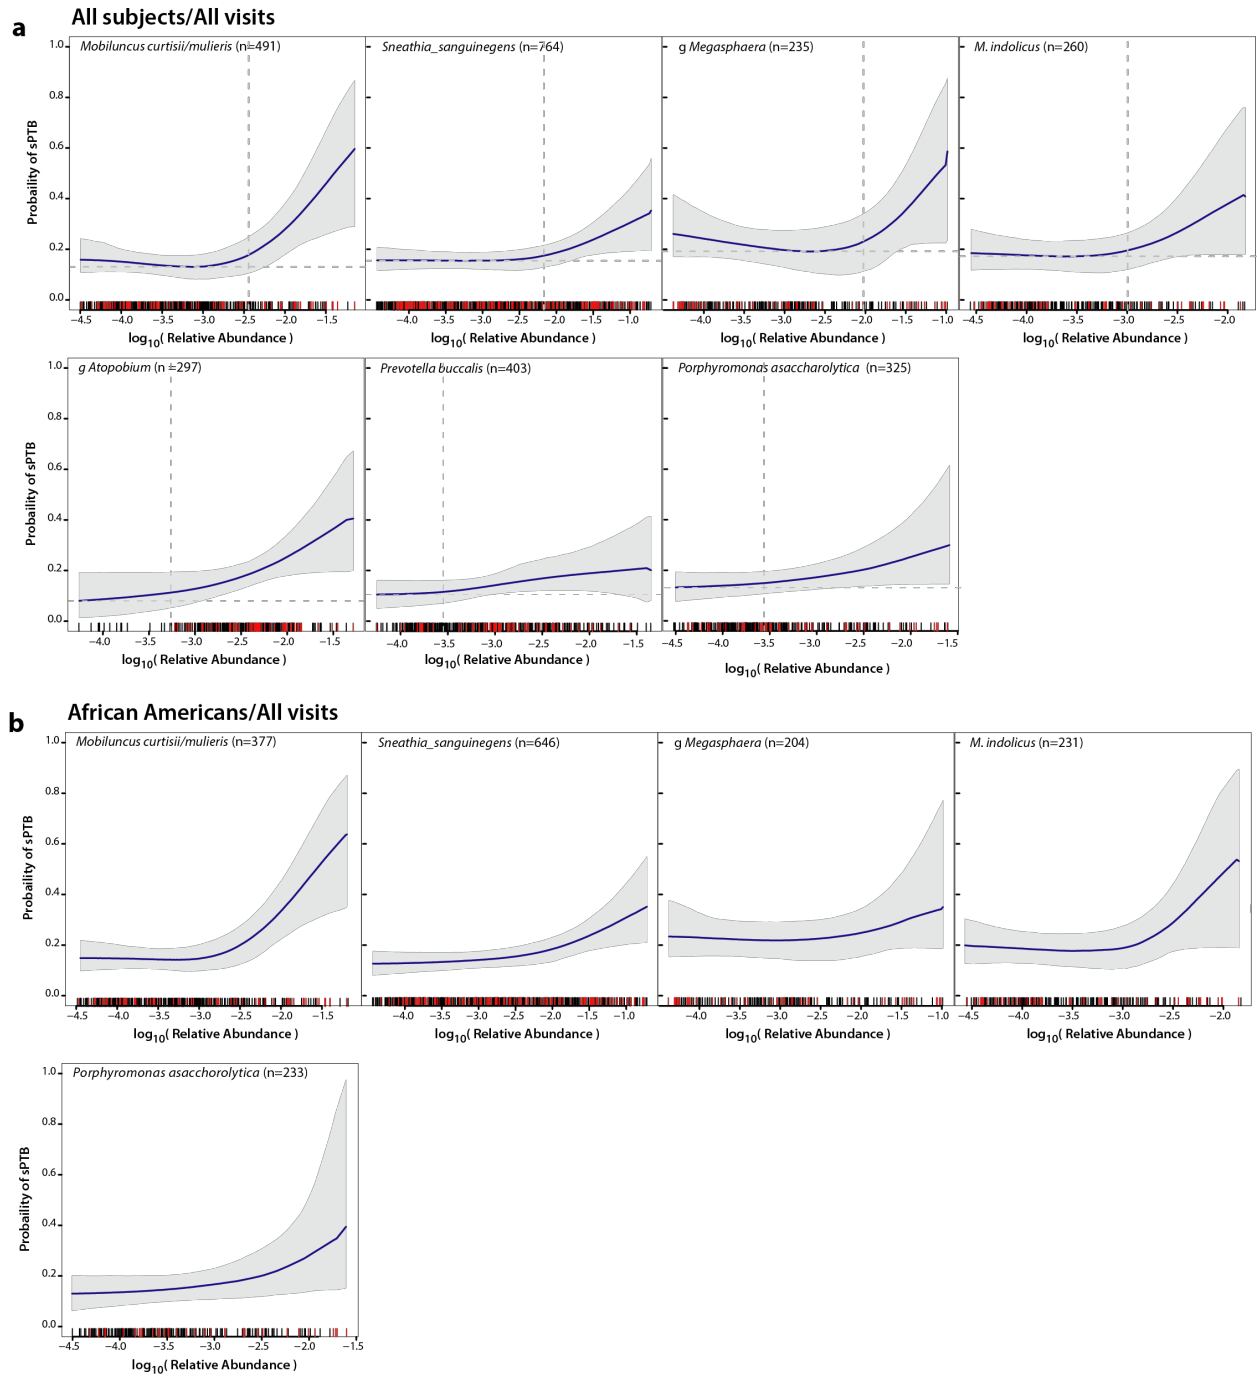

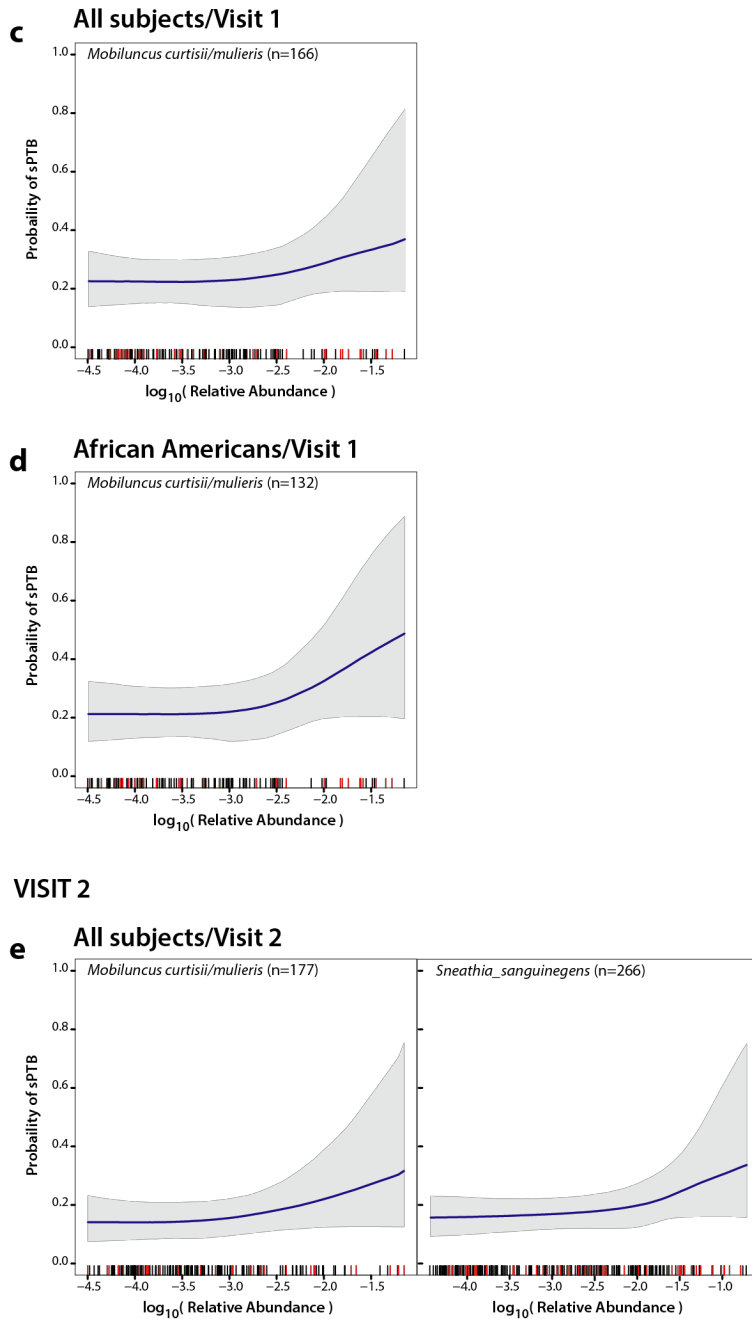

**Supplementary Figure 2** | Dependence of the risk of spontaneous preterm delivery on bacterial taxa relative abundance. Dependence of the risk of sPTB (defined as <37 weeks of gestation) on the relative abundance of bacterial taxa for which the dependence was statistically significant in (a) all subjects/all visits, (b) AA/all visits, (c) all subjects/visit 1, (d) AA/visit 1, (e) all subjects/visit 2. n represents the number of samples in which the bacterial taxa was detected and included in the analysis. Statistically significant taxa were identified using a Bayesian logistic regression nonparametric adaptive spline models.

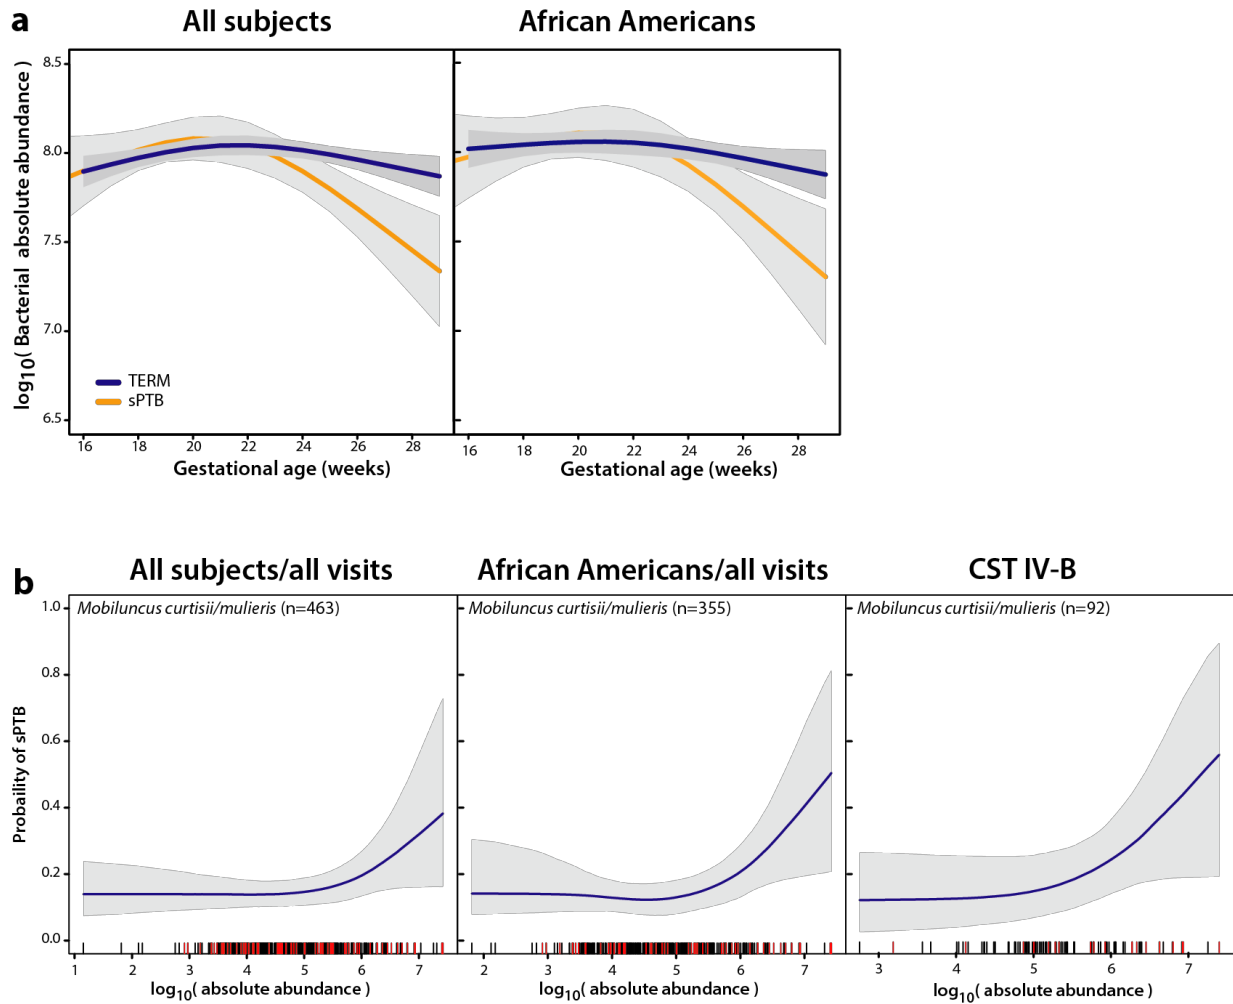

**Supplementary Figure 3** | Dependence of the risk of spontaneous preterm delivery on bacterial taxa absolute abundance. **(a)** Total bacterial absolute abundance as determined by 16S rRNA gene copy numbers over gestational age in term and preterm pregnancies in all subjects and AA. Dependence of the risk of sPTB on the absolute abundance of *M. curtisii/mulieris* in **(b)** all subjects, AA and all subjects with CST IV-B vaginal microbiota. n represents the number of samples where *M. curtisii/mulieris* was detected in each group.

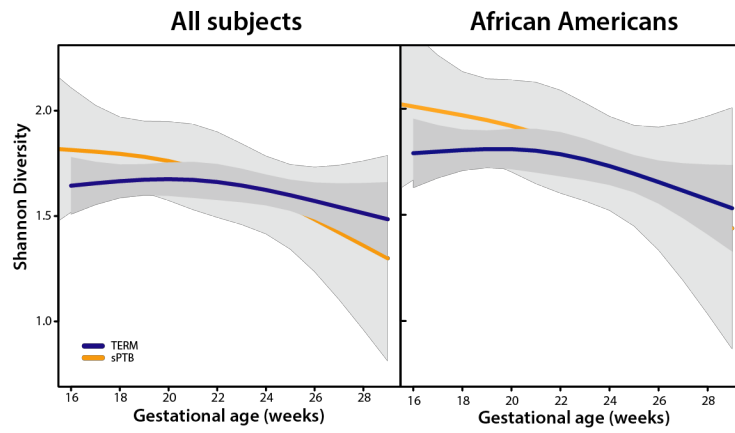

**Supplementary Figure 4** | Vaginal microbiota Shannon diversity over gestational age in term and preterm pregnancies in all subjects and African American women.

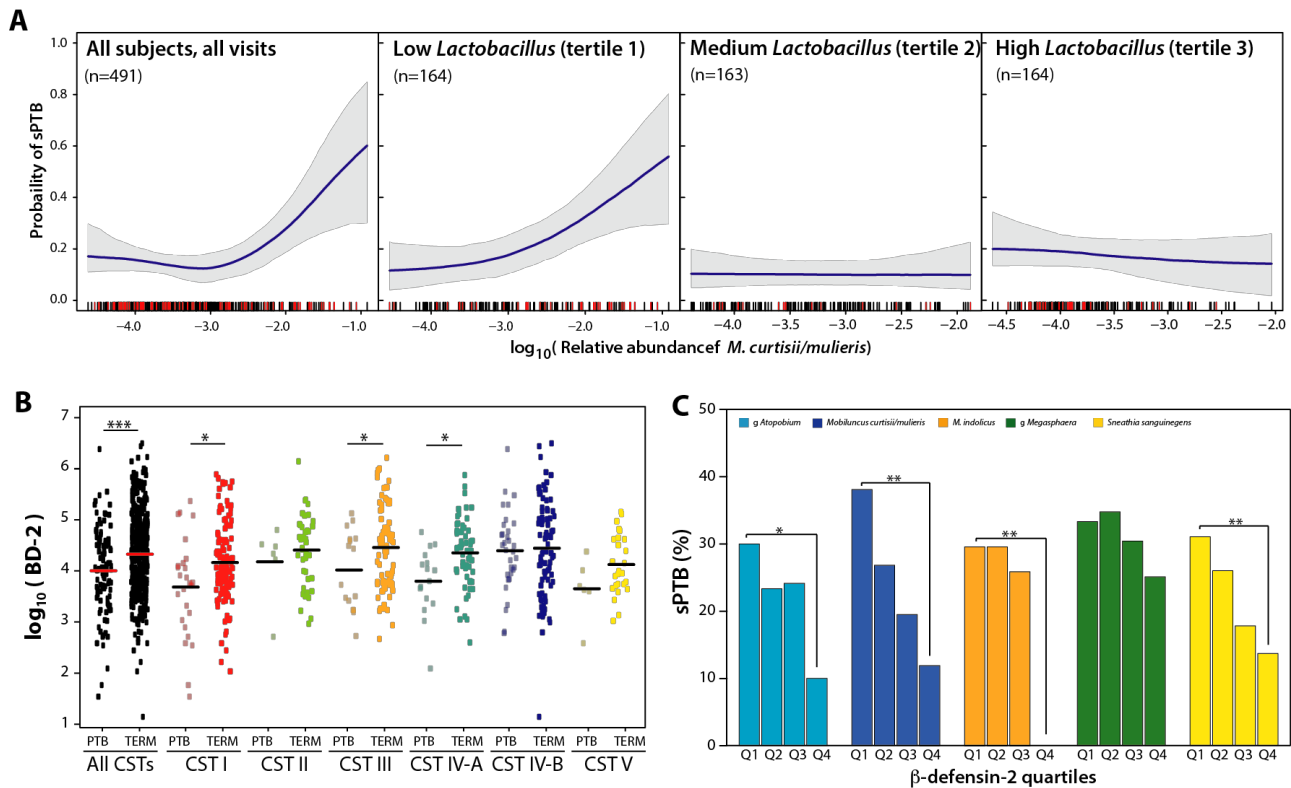

**Supplementary Figure 5** |  $\beta$ -defensin-2 and microbiota modulate the risk of spontaneous preterm delivery. **(a)** Modulation of the risk of sPTB by relative abundance of *M. curtisii/mulieris* stratified by *Lactobacillus* spp. relative abundance tertiles within all women when all visits are considered. n represents the number of samples where *M. curtisii/mulieris* was detected. **(b)**  $\log_{10}$   $\beta$ -defensin-2 abundances at visit 1 in all women stratified by pregnancy outcomes and vaginal community state types. p-values estimated using a t-test. **(c)** At visit 1 in all women, the risk of sPTB associated with the relative abundance of five bacterial taxa is modulated by the abundance of  $\beta$ -defensin-2. p-values were estimated using a Bayesian 2-proportions binomial model with uniform prior implemented in *rstan* R package. Statistical significance is shown as \* p-value <0.01, \*\* p-value <0.001 and \*\*\* p-value <0.0001.

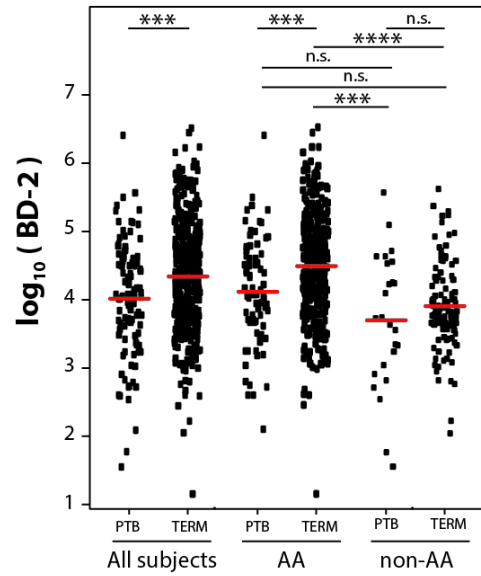

**Supplementary Figure 6** |  $\beta$ -defensin-2, ethnicity and pregnancy outcomes.  $\beta$ -defensin-2 at visit 1 in AA women and pregnancy outcomes stratified by vaginal community state types. p-values estimated using a t-test. Statistical significance is shown as \* p-value < 0.01, \*\* p-value < 0.001 and \*\*\* p-value < 0.0001.



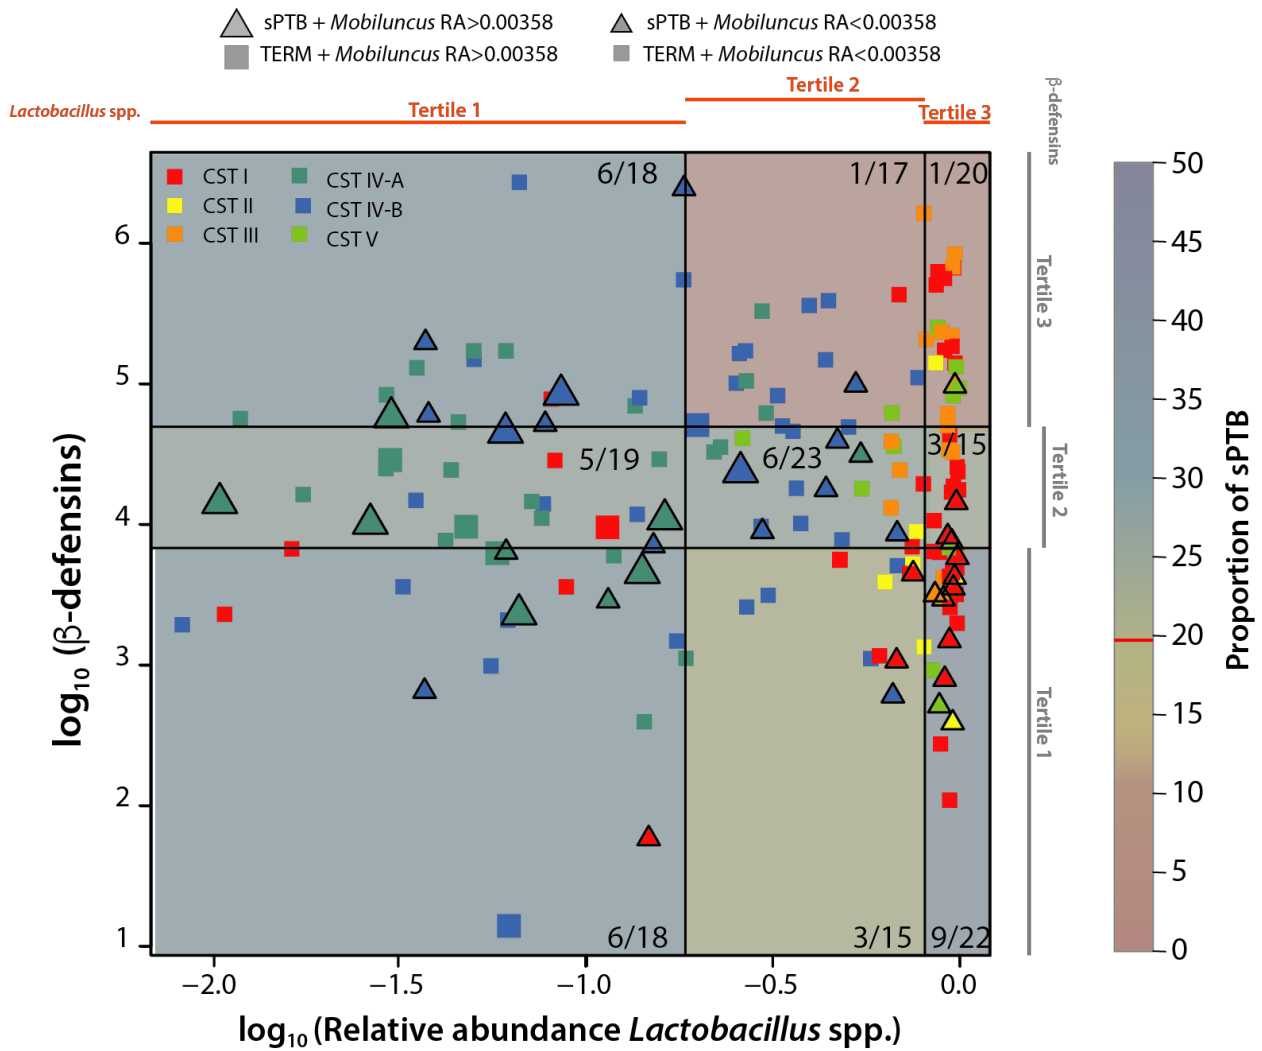

**Supplementary Figure 7** | Interactions between  $\beta$ -defensin-2, *Lactobacillus* spp. relative abundance, *M. curtisii/mulieris* relative abundance, vaginal community state types and pregnancy outcomes in all women at visit 1. Each woman who went on to deliver preterm is represented by a triangle, while those who delivered at term by a square. Large and small triangles or squares are colored by CSTs and indicate relative abundances of *M. curtisii/mulieris* above and below its threshold value, respectively, as defined in Fig. 1.  $\beta$ -defensin-2 concentrations and *Lactobacillus* spp. relative abundances were stratified into tertiles. The color of each quadrant indicates the proportion of sPTBs (number of sPTB/total births).

## Supplementary Tables

**Supplementary Table 1.** M&M study visit characteristics

| Visit characteristics                 | Visit 1          |                  |         | Visit 2          |                  |         | Visit 3          |                  |         |
|---------------------------------------|------------------|------------------|---------|------------------|------------------|---------|------------------|------------------|---------|
|                                       | Term<br>(n=419)  | sPTB<br>(n=101)  | p-value | Term<br>(n=423)  | sPTB<br>(n=80)   | p-value | Term<br>(n=419)  | sPTB<br>(n=59)   | p-value |
| Intercourse $\leq$ 24 hours           | 75 (17.9)        | 19 (18.8)        | 0.88    | 77 (18.2)        | 15 (18.7)        | 0.88    | 60 (14.4)        | 11 (18.6)        | 0.43    |
| Douching $\leq$ 24 hours              | 8 (1.9)          | 1 (1.0)          | 0.99    | 9 (2.1)          | 3 (3.7)          | 0.42    | 10 (2.4)         | 1 (1.7)          | 0.99    |
| Vaginal exam prior to visit           | 8 (1.9)          | 1 (1.0)          | 0.99    | 11 (2.6)         | 0                | 0.23    | 1 (0.2)          | 0                | 0.99    |
| Antibiotics $\leq$ 4 weeks            | 22 (5.2)         | 5 (4.9)          | 0.99    | 17 (4.0)         | 3 (3.7)          | 0.99    | 10 (2.4)         | 2 (3.4)          | 0.65    |
| Tobacco $\leq$ 4 weeks                | 22 (5.2)         | 8 (7.9)          | 0.34    | 16 (3.8)         | 5 (6.2)          | 0.36    | 16 (3.8)         | 4 (6.8)          | 0.29    |
| Vaginal pH $\geq$ 5.0                 | 290 (69.7)       | 76 (76)          | 0.22    | 277 (67.4)       | 59 (74.7)        | 0.23    | 291 (71.7)       | 42 (73.7)        | 0.87    |
| BMI- kg/m <sup>2</sup> , median (IQR) | 28.0 (24.1-33.2) | 28.4 (23.7-34.7) | 0.45    | 28.8 (25.0-34.1) | 27.9 (24.8-33.0) | 0.64    | 29.9 (26.0-35.0) | 28.8 (25.3-33.0) | 0.39    |

## Supplementary Table 2.

Frequencies of CST per visit for all subjects, non-African Americans, African American and for each race represented in the cohort. p-values were estimated using ordinary logistic regression models. Significant p-values and trends are highlighted in bold

| All subjects | Visit 1 |       |                 | Visit 2 |       |                 | Visit 3 |       |                 | All visits |       |                 |
|--------------|---------|-------|-----------------|---------|-------|-----------------|---------|-------|-----------------|------------|-------|-----------------|
|              | sPTB    | TERM  | p-value         | sPTB    | TERM  | p-value         | sPTB    | TERM  | p-value         | sPTB       | TERM  | p-value         |
| I            | 25.2    | 28.7  | 0.479           | 23.8    | 32.4  | 0.128           | 35.6    | 33.4  | 0.74            | 27.3       | 31.5  | 0.34            |
| II           | 5.83    | 9.98  | 0.196           | 7.5     | 10.9  | 0.366           | 10.2    | 9.55  | 0.879           | 7.44       | 10.1  | 0.737           |
| III          | 15.5    | 20    | 0.308           | 18.8    | 17    | 0.708           | 20.3    | 20.3  | 0.992           | 17.8       | 19.1  | 0.805           |
| IV-A         | 15.5    | 14.3  | 0.741           | 16.2    | 13.2  | 0.474           | 13.6    | 13.4  | 0.967           | 26.9       | 19.5  | <b>0.0512</b>   |
| IV-B         | 32      | 20.9  | <b>0.0171</b>   | 28.8    | 19.4  | <b>0.0607</b>   | 15.3    | 18.1  | 0.588           | 15.3       | 13.6  | 0.507           |
| V            | 5.83    | 6.18  | 0.894           | 5       | 7.09  | 0.497           | 5.08    | 5.25  | 0.957           | 5.37       | 6.18  | 0.94            |
| NonAA        | sPTB    | TERM  | p-value         | sPTB    | TERM  | p-value         | sPTB    | TERM  | p-value         | sPTB       | TERM  | p-value         |
| I            | 44      | 52.8  | 0.43            | 43.5    | 53.2  | 0.4             | 57.9    | 52.7  | 0.677           | 47.8       | 52.9  | 0.444           |
| II           | 12      | 9.26  | 0.678           | 13      | 9.91  | 0.656           | 10.5    | 10.9  | 0.96            | 11.9       | 10    | 0.64            |
| III          | 16      | 13    | 0.69            | 17.4    | 10.8  | 0.38            | 21.1    | 11.8  | 0.279           | 17.9       | 11.9  | 0.181           |
| IV-A         | 0       | 2.78  | 0.994           | 0       | 2.7   | 0.994           | 0       | 2.73  | 0.995           | 0          | 2.74  | 0.99            |
| IV-B         | 24      | 6.48  | <b>0.0129</b>   | 26.1    | 6.31  | <b>0.00703</b>  | 10.5    | 7.27  | 0.626           | 20.9       | 6.69  | <b>0.000467</b> |
| V            | 4       | 15.7  | 0.155           | 0       | 17.1  | 0.99            | 0       | 14.5  | 0.991           | 1.49       | 15.8  | <b>0.0135</b>   |
| AA           | sPTB    | TERM  | p-value         | sPTB    | TERM  | p-value         | sPTB    | TERM  | p-value         | sPTB       | TERM  | p-value         |
| I            | 19.5    | 20.4  | 0.85            | 14.3    | 25    | 0.0859          | 25      | 26.5  | 0.836           | 19.1       | 24    | 0.161           |
| II           | 3.9     | 10.2  | 0.0945          | 5.36    | 11.2  | 0.195           | 10      | 9.06  | 0.847           | 5.78       | 10.2  | <b>0.0742</b>   |
| III          | 14.3    | 22.4  | 0.121           | 19.6    | 19.2  | 0.943           | 20      | 23.3  | 0.641           | 17.3       | 21.6  | 0.204           |
| IV-A         | 20.8    | 18.2  | 0.605           | 23.2    | 17    | 0.266           | 20      | 17.2  | 0.656           | 21.4       | 17.5  | 0.217           |
| IV-B         | 35.1    | 25.9  | 0.108           | 30.4    | 24    | 0.316           | 17.5    | 22    | 0.515           | 29.5       | 24    | 0.125           |
| V            | 6.49    | 2.88  | 0.137           | 7.14    | 3.53  | 0.217           | 7.5     | 1.94  | <b>0.0529</b>   | 6.94       | 2.78  | <b>0.00776</b>  |
| Race         | AA      | nonAA | p-value         | AA      | nonAA | p-value         | AA      | nonAA | p-value         | AA         | nonAA | p-value         |
| I            | 20.3    | 51.1  | <b>4.05E-11</b> | 23.4    | 51.5  | <b>4.19E-09</b> | 26.4    | 53.5  | <b>5.15E-08</b> | 23.2       | 52    | <b>3.65E-25</b> |
| II           | 8.97    | 9.77  | 0.783           | 10.3    | 10.4  | 0.968           | 9.17    | 10.9  | 0.58            | 9.49       | 10.4  | 0.617           |
| III          | 20.8    | 13.5  | <b>0.068</b>    | 19.3    | 11.9  | <b>0.0565</b>   | 22.9    | 13.2  | <b>0.0203</b>   | 21         | 12.9  | <b>0.000476</b> |
| IV-A         | 18.7    | 2.26  | <b>0.00012</b>  | 17.9    | 2.24  | <b>0.000168</b> | 17.5    | 2.33  | <b>0.000276</b> | 18.1       | 2.27  | <b>8.08E-11</b> |
| IV-B         | 27.7    | 9.77  | <b>5.51E-05</b> | 25      | 9.7   | <b>0.000335</b> | 21.5    | 7.75  | <b>0.000853</b> | 24.8       | 9.09  | <b>2.07E-10</b> |
| V            | 3.59    | 13.5  | <b>0.000113</b> | 4.08    | 14.2  | <b>0.000174</b> | 2.58    | 12.4  | <b>9.84E-05</b> | 3.43       | 13.4  | <b>3.22E-11</b> |

### Supplementary Table 3.

Maximum change of risk of sPTB in different sub-samples of the cohort for phylotypes relative abundance with significantly non-zero effect size (q-value significance set at 0.05) and an effect size amplitude of at least 10%. RA is relative abundance. n(TERM) and n(SPTB): n represents the number of samples and (TERM/sPTB) the number of participants included in the analysis.

| Conditions                                                       | Phylotypes                         | Effect size | p-value  | q-value   | log <sub>10</sub> (RA)<br>at mode | n(TERM)   | n(sPTB)   | RA(%) at<br>mode | RA(%)<br>Threshold<br>(p=0.1) |
|------------------------------------------------------------------|------------------------------------|-------------|----------|-----------|-----------------------------------|-----------|-----------|------------------|-------------------------------|
| <b>All visits and all subjects</b>                               | <i>Sneathia sanguinegens</i>       | 0.1986      | 1.00E-16 | 3.600E-15 | 3.885                             | 629 (318) | 135 (76)  | 0.0130           | <b>0.00665</b>                |
|                                                                  | <i>Mobiluncus curtisii/mulieri</i> | 0.4663      | 1.00E-16 | 3.600E-15 | 3.954                             | 407 (240) | 84 (56)   | 0.0111           | <b>0.00358</b>                |
|                                                                  | <i>g Megasphaera</i>               | 0.3962      | 1.85E-10 | 4.434E-09 | 2.940                             | 178 (122) | 57 (41)   | 0.1148           | <b>0.00949</b>                |
|                                                                  | <i>M. indolicus</i>                | 0.2429      | 1.01E-08 | 1.826E-07 | 4.125                             | 208 (138) | 52 (38)   | 0.0075           | <b>0.00100</b>                |
|                                                                  | <i>Porphyromonas asaccharo</i>     | 0.1673      | 7.38E-05 | 1.063E-03 | 3.670                             | 271 (167) | 54 (40)   | 0.0214           | <b>0.00054</b>                |
|                                                                  | <i>g Atopobium</i>                 | 0.3251      | 2.36E-03 | 1.885E-02 | 2.400                             | 241 (130) | 56 (33)   | 0.3980           | <b>0.00026</b>                |
|                                                                  | <i>Prevotella buccalis</i>         | 0.1042      | 6.10E-03 | 3.991E-02 | 3.197                             | 347 (192) | 56 (37)   | 0.0636           | <b>0.00028</b>                |
| <b>Visit V1 and all subjects</b>                                 | <i>Mobiluncus curtisii/mulieri</i> | 0.1460      | 5.80E-04 | 2.955E-02 | 4.014                             | 126       | 40        | 0.0097           |                               |
|                                                                  | <i>Sneathia sanguinegens</i>       | 0.1799      | 6.42E-05 | 2.528E-03 | 3.868                             | 217       | 49        | 0.0136           |                               |
| <b>Visit V2 and all subjects</b>                                 | <i>Mobiluncus curtisii/mulieri</i> | 0.1762      | 1.01E-04 | 2.528E-03 | 3.888                             | 146       | 31        | 0.0129           |                               |
| <b>All visits in African Americans</b>                           | <i>Mobiluncus curtisii/mulieri</i> | 0.5291      | 5.47E-05 | 1.012E-03 | 3.989                             | 311 (183) | 66 (45)   | 0.0103           |                               |
|                                                                  | <i>M. indolicus</i>                | 0.3607      | 1.06E-13 | 7.854E-12 | 3.955                             | 182 (116) | 49 (35)   | 0.0111           |                               |
|                                                                  | <i>Sneathia sanguinegens</i>       | 0.2255      | 1.65E-10 | 6.096E-09 | 2.677                             | 538 (257) | 108 (57)  | 0.2104           |                               |
|                                                                  | <i>Porphyromonas asaccharo</i>     | 0.2651      | 1.83E-06 | 4.501E-05 | 3.653                             | 193 (121) | 40 (30)   | 0.0222           |                               |
|                                                                  | <i>g Megasphaera</i>               | 0.1325      | 1.22E-03 | 1.802E-02 | 2.952                             | 155 (104) | 49 (34)   | 0.1117           |                               |
| <b>Visit V1 in African Americans</b>                             | <i>Mobiluncus curtisii/mulieri</i> | 0.2759      | 3.83E-07 | 2.028E-05 | 4.010                             | 100       | 32        | 0.0098           |                               |
| <b>All visits Non-African Americans</b>                          | <i>Lactobacillus iners</i>         | 0.1516      | 8.12E-04 | 2.719E-02 | 2.546                             | 319 (112) | 67(27)    | 0.2844           |                               |
|                                                                  | <i>Atopobium vaginae</i>           | 0.1122      | 1.44E-03 | 3.204E-02 | 3.556                             | 214 (100) | 58 (27)   | 0.0278           |                               |
| <b>Visit V1 in non-African Americans</b>                         | None                               | n/a         | n/a      | n/a       | n/a                               | n/a       | n/a       | n/a              |                               |
| <b>Nulliparous women</b>                                         | <i>g Megasphaera</i>               | 0.6796      | 7.95E-13 | 4.270E-11 | 3.806                             | 67 (510)  | 17 (12)   | 0.0156           |                               |
|                                                                  | <i>Sneathia sanguinegens</i>       | 0.2474      | 1.20E-12 | 4.270E-11 | 3.889                             | 257 (130) | 49 (28)   | 0.0129           |                               |
|                                                                  | <i>Atopobium vaginae</i>           | 0.1159      | 1.11E-04 | 2.632E-03 | 3.532                             | 441 (173) | 75 (36)   | 0.0294           |                               |
|                                                                  | <i>g Atopobium</i>                 | 0.5151      | 1.19E-03 | 2.106E-02 | 2.509                             | 93 (49)   | 19 (11)   | 0.3097           |                               |
|                                                                  | <i>Globicatella sp</i>             | 0.1901      | 1.79E-03 | 2.537E-02 | 3.899                             | 120 (71)  | 20 (13)   | 0.0126           |                               |
|                                                                  | <i>Streptococcus agalactiae</i>    | 0.1706      | 2.55E-03 | 3.019E-02 | 4.013                             | 86 (69)   | 21 (16)   | 0.0097           |                               |
| <b>Multiparous women</b>                                         | <i>Mobiluncus curtisii/mulieri</i> | 0.4445      | 1.00E-16 | 3.600E-15 | 3.903                             | 209 (133) | 57 (38)   | 0.0125           |                               |
| <b>CST I women</b>                                               | <i>Lactobacillus iners</i>         | 0.2307      | 4.56E-06 | 3.149E-04 | 2.454                             | 388 (156) | 361 (150) | 0.3516           |                               |
|                                                                  | <i>Lactobacillus jensenii</i>      | 0.1061      | 1.17E-03 | 4.041E-02 | 2.122                             | 361 (150) | 57 (29)   | 0.7551           |                               |
| <b>CST III women</b>                                             | None                               | n/a         | n/a      | n/a       | n/a                               | n/a       | n/a       | n/a              |                               |
| <b>CST IV-A women</b>                                            | None                               | n/a         | n/a      | n/a       | n/a                               | n/a       | n/a       | n/a              |                               |
| <b>CST IVB women</b>                                             | <i>Mobiluncus curtisii/mulieri</i> | 0.6897      | 7.78E-08 | 2.022E-06 | 3.258                             | 76 (47)   | 23 (16)   | 0.0552           |                               |
|                                                                  | <i>Mycoplasma hominis</i>          | 0.3466      | 5.08E-04 | 8.809E-03 | 3.148                             | 98 (55)   | 22 (15)   | 0.0711           |                               |
|                                                                  | <i>Sneathia sanguinegens</i>       | 0.3215      | 1.08E-03 | 1.407E-02 | 2.737                             | 163 (78)  | 36 (20)   | 0.1832           |                               |
| <b>All subjects per Lactobacillus Tertile</b>                    | <i>Mobiluncus curtisii/mulieri</i> | 0.4485      | 1.25E-05 | 4.996E-05 | 3.216                             | 131 (91)  | 33 (29)   | 0.0608           |                               |
| <b>All subjects per Lactobacillus Tertile</b>                    | <i>Mobiluncus curtisii/mulieri</i> | 0.0037      | 4.52E-01 | 4.522E-01 | 3.204                             | 139 (106) | 24 (23)   | 0.0625           |                               |
| <b>All subjects per Lactobacillus Tertile</b>                    | <i>Mobiluncus curtisii/mulieri</i> | -0.0625     | 2.27E-01 | 3.023E-01 | 4.017                             | 137 (107) | 27 (27)   | 0.0096           |                               |
| <b>All visits in African Americans per Lactobacillus Tertile</b> | <i>Mobiluncus curtisii/mulieri</i> | 0.5732      | 5.12E-06 | 2.048E-05 | 3.102                             | 95 (63)   | 31 (20)   | 0.0791           |                               |
| <b>All visits in African Americans per Lactobacillus Tertile</b> | <i>Mobiluncus curtisii/mulieri</i> | 0.0361      | 3.02E-01 | 3.548E-01 | 3.140                             | 109 (78)  | 16 (14)   | 0.0724           |                               |
| <b>All visits in African Americans per Lactobacillus Tertile</b> | <i>Mobiluncus curtisii/mulieri</i> | -0.0201     | 3.55E-01 | 3.548E-01 | 4.066                             | 107 (83)  | 19 (17)   | 0.0086           |                               |



#### Supplementary Table 4.

Maximum change of risk of sPTB in different sub-samples of the cohort for phylotypes absolute abundances with significantly non-zero effect size (q-value significance set at 0.05) and an effect size amplitude of at least 10%. RA is relative abundance. n(TERM) and n(SPTB): n represents the number of samples and (TERM/sPTB) the number of participants included in the analysis.

| Conditions                                 | Phylotypes                          | Effect size | p-value  | q-value  | log10(RA) |                     | RA(%) at mode |
|--------------------------------------------|-------------------------------------|-------------|----------|----------|-----------|---------------------|---------------|
|                                            |                                     |             |          |          | at mode   | n(TERM) n(sPTB)     |               |
| <b>All visits and all subjects</b>         | <i>Mobiluncus curtisii/mulieris</i> | 0.2595      | 1.00E-16 | 3.60E-15 | 3.957     | 395 (234) 76 (51)   | 0.0110        |
| <b>Visit 1 and all subjects</b>            | None                                | n/a         | n/a      | n/a      | n/a       | n/a n/a             | n/a           |
| <b>Visit 2 and all subjects</b>            | None                                | n/a         | n/a      | n/a      | n/a       | n/a n/a             | n/a           |
| <b>All visits in African Americans</b>     | <i>Mobiluncus curtisii/mulieris</i> | 0.3816      | 1.00E-16 | 3.60E-15 | 4.001     | 303 (179) 58 (40)   | 0.0100        |
| <b>Visit 1 in African Americans</b>        | None                                | n/a         | n/a      | n/a      | n/a       | n/a n/a             | n/a           |
| <b>All visits in non-African Americans</b> | None                                | n/a         | n/a      | n/a      | n/a       | n/a n/a             | n/a           |
| <b>Nulliparous women</b>                   | None                                | n/a         | n/a      | n/a      | n/a       | n/a n/a             | n/a           |
| <b>Multiparous women</b>                   | <i>Mobiluncus curtisii/mulieris</i> | 0.3399      | 2.10E-13 | 1.45E-11 | 3.903     | 204 (130) 204 (130) | 0.0125        |
| <b>CST IVB women</b>                       | <i>Mobiluncus curtisii/mulieris</i> | 0.4377      | 1.47E-04 | 8.52E-03 | 3.215     | 76 (47) 76 (47)     | 0.0610        |

## Supplementary Table 5.

$\beta$ -defensin-2 data and statistics in support of Figures 2, Supplementary Figures 5 and 6. p-values were estimated using a Bayesian 2-proportions binomial model with uniform prior implemented in *rstan* R package. Significant p-value are highlighted in bold. Significant p-values are highlighted in bold and yellow.

|              | TERM     | sPTB     | p-val          |       | TERM     | sPTB     | p-val          |
|--------------|----------|----------|----------------|-------|----------|----------|----------------|
| All subjects | 4.329165 | 4.004237 | <b>0.00061</b> | AA    | 4.476802 | 4.100683 | <b>0.00028</b> |
|              |          |          |                | nonAA | 3.898671 | 3.691647 | 0.3271         |

  

| All subjects at V1 - Beta-defensin-2 log(quant) |            |           |              | AA at V1 - Beta-defensin-2 log(quant) |           |           |              |
|-------------------------------------------------|------------|-----------|--------------|---------------------------------------|-----------|-----------|--------------|
|                                                 | TERM (n)   | sPTB (n)  | p-val        |                                       | TERM (n)  | sPTB (n)  | p-val        |
| I                                               | 4.16 (121) | 3.68 (26) | 0.030        | I                                     | 4.44 (64) | 4.00 (15) | 0.070        |
| II                                              | 4.41 (42)  | 4.18 (6)  | 0.500        | II                                    | 4.45 (32) | 4.54 (3)  | 0.650        |
| III                                             | 4.46 (83)  | 4.02 (16) | <b>0.050</b> | III                                   | 4.57 (70) | 3.96 (11) | <b>0.050</b> |
| IV-A                                            | 4.44 (87)  | 4.40 (32) | 0.780        | IV-A                                  | 4.33 (57) | 3.80 (16) | <b>0.010</b> |
| IV-B                                            | 4.35 (60)  | 3.80 (16) | <b>0.010</b> | IV-B                                  | 4.53 (80) | 4.44 (26) | 0.630        |
| V                                               | 4.12 (26)  | 3.65 (6)  | 0.120        | V                                     | 4.57 (9)  | 3.66 (5)  | <b>0.030</b> |

  

|      | TERM (n)                           | sPTB (n)                           | p-val        |      | TERM (n)                           | sPTB (n)                           | p-val        |
|------|------------------------------------|------------------------------------|--------------|------|------------------------------------|------------------------------------|--------------|
| I    | 14141.35 [109.95, 784211.12] (134) | 4824.81 [35.20, 232820.89] (26)    | <b>0.030</b> | I    | 27813.29 [275.84, 784211.12] (64)  | 9971.59 [385.48, 232820.89] (15)   | 0.070        |
| II   | 26515.91 [925.41, 1379433.37] (44) | 15100.31 [515.27, 63206.38] (6)    | 0.470        | II   | 28202.74 [925.41, 1379433.37] (32) | 34720.78 [21667.82, 63206.38] (3)  | 0.650        |
| III  | 31417.29 [461.15, 1671281.50] (95) | 10406.67 [542.13, 135216.48] (16)  | <b>0.030</b> | III  | 36788.78 [461.15, 1641368.62] (70) | 9145.25 [542.13, 135216.48] (11)   | <b>0.050</b> |
| IV-A | 21651.44 [397.46, 758687.38] (65)  | 6270.79 [122.68, 58230.71] (16)    | <b>0.010</b> | IV-A | 21482.21 [397.46, 758687.38] (57)  | 6270.79 [122.68, 58230.71] (16)    | <b>0.010</b> |
| IV-B | 29707.13 [14.05, 3395774.00] (109) | 24844.25 [606.48, 2457369.50] (32) | 0.640        | IV-B | 33739.11 [14.05, 3187321.00] (80)  | 27538.12 [606.48, 2457369.50] (26) | 0.630        |
| V    | 13683.86 [1071.15, 549539.00] (29) | 4477.76 [390.13, 23820.41] (6)     | 0.110        | V    | 37262.96 [6072.55, 141913.12] (9)  | 4529.19 [390.13, 23820.41] (5)     | <b>0.030</b> |

  

|      | Q1 sPTB/TERM (%) | Q4 sPTB/TERM (%) | p-val |      | Q1 sPTB/TERM (%) | Q4 sPTB/TERM (%) | p-val        |
|------|------------------|------------------|-------|------|------------------|------------------|--------------|
| I    | 10/37 (27.0)     | 5/36 (13.9)      | 0.094 | I    | 6/20 (30.0)      | 3/20 (15.0)      | 0.147        |
| II   | 1/12 (8.3)       | 3/12 (25.0)      | 0.183 | II   | 0/9 (0.0)        | 0/9 (0.0)        | 0.498        |
| III  | 8/25 (32.0)      | 3/24 (12.5)      | 0.073 | III  | 6/21 (28.6)      | 0/20 (0.0)       | <b>0.030</b> |
| IV-A | 7/19 (36.8)      | 3/19 (15.8)      | 0.090 | IV-A | 7/19 (36.8)      | 1/18 (5.6)       | <b>0.030</b> |
| IV-B | 6/30 (20.0)      | 10/29 (34.5)     | 0.116 | IV-B | 6/27 (22.2)      | 4/27 (14.8)      | 0.255        |
| V    | 3/8 (37.5)       | 2/8 (25.0)       | 0.315 | V    | 3/4 (75.0)       | 0/4 (0.0)        | 0.069        |

**Supplementary Table 6.**

Statistical analysis in support of Figures 3 and Supplementary Figure 7. p-values were estimated using Bayesian binomial models using uniform prior for two proportions implemented in *rstan* R package. Significant p-values are highlighted in bold and yellow.

**All subjects at visit 1**

| sPTB counts   |       | Lactobacillus tertiles |       |       |
|---------------|-------|------------------------|-------|-------|
|               |       | Lb T1                  | Lb T2 | Lb T3 |
| BD-2 tertiles | BD T3 | 6/18                   | 1/17  | 1/20  |
|               | BD T2 | 5/19                   | 6/23  | 3/13  |
|               | BD T1 | 6/18                   | 3/15  | 9/22  |

  

| Proportions of sPTB |       | Lactobacillus tertiles |       |       |
|---------------------|-------|------------------------|-------|-------|
|                     |       | Lb T1                  | Lb T2 | Lb T3 |
| BD-2 tertiles       | BD T3 | 0.33                   | 0.06  | 0.05  |
|                     | BD T2 | 0.26                   | 0.26  | 0.23  |
|                     | BD T1 | 0.33                   | 0.20  | 0.41  |

  

| Relative risk of sPTB (proportion of sPTB/baseline proportion of sPTB (19.58%)) |       | Lactobacillus tertiles |       |       |
|---------------------------------------------------------------------------------|-------|------------------------|-------|-------|
|                                                                                 |       | Lb T1                  | Lb T2 | Lb T3 |
| BD-2 tertile                                                                    | BD T3 | 1.70                   | 0.30  | 0.26  |
|                                                                                 | BD T2 | 1.34                   | 1.33  | 1.18  |
|                                                                                 | BD T1 | 1.70                   | 1.02  | 2.09  |

  

| p-value - Risk of sPTB compared to baseline risk (19.58%) |       | Lactobacillus tertiles |       |              |
|-----------------------------------------------------------|-------|------------------------|-------|--------------|
|                                                           |       | Lb T1                  | Lb T2 | Lb T3        |
| BD-2 tertiles                                             | BD T3 | 0.067                  | 0.107 | 0.069        |
|                                                           | BD T2 | 0.188                  | 0.191 | 0.287        |
|                                                           | BD T1 | 0.067                  | 0.390 | <b>0.008</b> |

**African Americans at visit 1**

| sPTB counts   |       | Lactobacillus tertiles |       |       |
|---------------|-------|------------------------|-------|-------|
|               |       | Lb T1                  | Lb T2 | Lb T3 |
| BD-2 tertiles | BD T3 | 2/11                   | 2/15  | 1/18  |
|               | BD T2 | 6/18                   | 3/15  | 1/10  |
|               | BD T1 | 6/15                   | 4/13  | 7/16  |

  

| Proportions of sPTB |       | Lactobacillus tertiles |       |       |
|---------------------|-------|------------------------|-------|-------|
|                     |       | Lb T1                  | Lb T2 | Lb T3 |
| BD-2 tertiles       | BD T3 | 0.18                   | 0.13  | 0.06  |
|                     | BD T2 | 0.33                   | 0.20  | 0.10  |
|                     | BD T1 | 0.40                   | 0.31  | 0.44  |

  

| Relative risk of sPTB (proportion of sPTB/baseline proportion of sPTB (19.58%)) |       | Lactobacillus tertiles |       |       |
|---------------------------------------------------------------------------------|-------|------------------------|-------|-------|
|                                                                                 |       | Lb T1                  | Lb T2 | Lb T3 |
| BD-2 tertile                                                                    | BD T3 | 0.93                   | 0.68  | 0.28  |
|                                                                                 | BD T2 | 1.70                   | 1.02  | 0.51  |
|                                                                                 | BD T1 | 2.04                   | 1.57  | 2.23  |

  

| p-value - Risk of sPTB compared to baseline risk (19.58%) |       | Lactobacillus tertiles |       |              |
|-----------------------------------------------------------|-------|------------------------|-------|--------------|
|                                                           |       | Lb T1                  | Lb T2 | Lb T3        |
| BD-2 tertiles                                             | BD T3 | 0.431                  | 0.370 | 0.096        |
|                                                           | BD T2 | 0.063                  | 0.385 | 0.332        |
|                                                           | BD T1 | <b>0.026</b>           | 0.122 | <b>0.011</b> |

**All subjects at visit 1 - Two regions considered**

**sPTB counts**

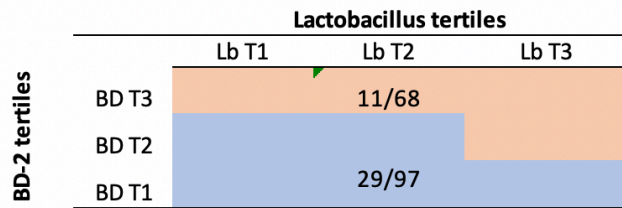

**Proportions of sPTB**

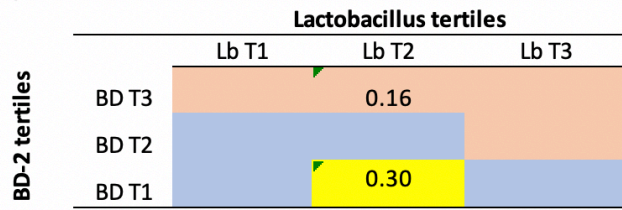

**Relative risk of sPTB (proportion of sPTB/baseline proportion of sPTB (19.58%))**

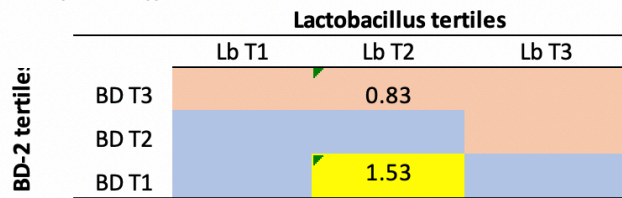

**p-value - Risk of sPTB compared to baseline risk (19.58%)**

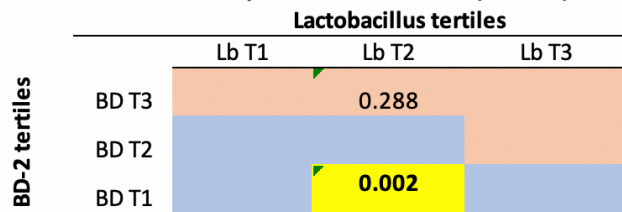

**African Americans at visit 1 - Two regions considered**

**sPTB counts**

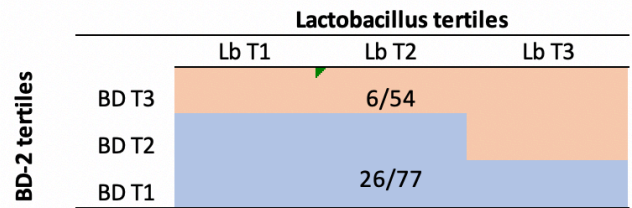

**Proportions of sPTB**

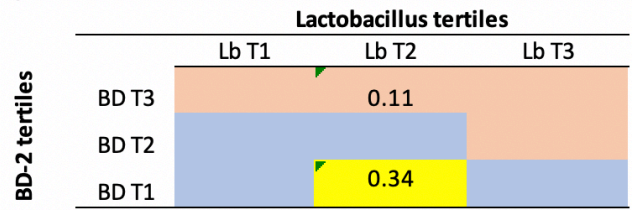

**Relative risk of sPTB (proportion of sPTB/baseline proportion of sPTB (19.58%))**

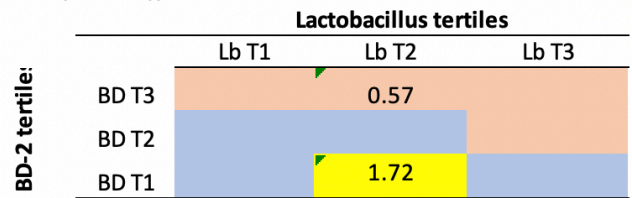

**p-value - Risk of sPTB compared to baseline risk (19.58%)**

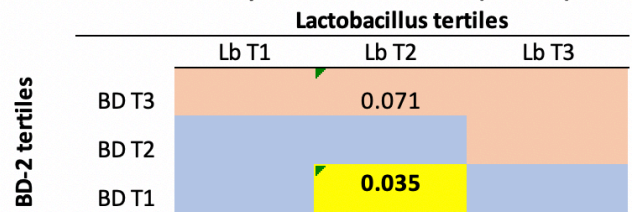



## **Supplementary Data Files**

### **Supplementary Data 1.**

Taxonomic assignment tables of taxa relative abundance and associated metadata.

### **Supplementary Data 2.**

Taxonomic assignment tables of taxa sequence counts and associated metadata.

### **Supplementary Data 3.**

Taxonomic assignments for 14 positive control samples comprising of a mixture of samples with known compositions.
